# Supplementary material for: A Novel Peer-to-Peer Coaching Program to Support Digital Mental Health: Design and Implementation
Source: PubMed Central journal article supplement (PMC8829693; doi:10.2196/32430), 2022-01-26
Supplement: mental_v9i1e32430_app1.pdf [file mental_v9i1e32430_app1.pdf]

## Process Skill & Module Integration Rating Anchors

| Categorical Ratings           | Near Absence of Demonstrated Skills/ Needs Remediation                                                                                                                                |   | Rarely and Inconsistently Demonstrated/ Beginner Level                                                                                                                                 |   | Frequently Demonstrated with Occasional Lapses/ Intermediate Level                                                                                                                                                                                                                                                            |   | Frequently and Consistently Demonstrated / Advanced Level                                                                                                                                                         |   | Consistently and Skillfully Demonstrated / Exemplary Level                                                                                                                                                                                               |    |
|-------------------------------|---------------------------------------------------------------------------------------------------------------------------------------------------------------------------------------|---|----------------------------------------------------------------------------------------------------------------------------------------------------------------------------------------|---|-------------------------------------------------------------------------------------------------------------------------------------------------------------------------------------------------------------------------------------------------------------------------------------------------------------------------------|---|-------------------------------------------------------------------------------------------------------------------------------------------------------------------------------------------------------------------|---|----------------------------------------------------------------------------------------------------------------------------------------------------------------------------------------------------------------------------------------------------------|----|
| Numerical Ratings             | 1                                                                                                                                                                                     | 2 | 3                                                                                                                                                                                      | 4 | 5                                                                                                                                                                                                                                                                                                                             | 6 | 7                                                                                                                                                                                                                 | 8 | 9                                                                                                                                                                                                                                                        | 10 |
| <b>Authenticity</b>           | Completely preoccupied with own performance as evidenced by fidgeting, not looking at screen, long pauses, overly scripted or ridged responses<br><br>No attention toward participant |   | Often preoccupied with own performance as evidenced by fidgeting, not looking at the screen, long pauses, overly scripted or ridged responses<br><br>Some attention toward participant |   | Approximately half of attention on own performance and half attention toward participant                                                                                                                                                                                                                                      |   | Little to no preoccupation with own performance<br><br>Consistent authenticity throughout session, as evidenced by focus/interest in participant, expression of caring and warmth, and present moment awareness   |   | Little to no preoccupation with own performance<br><br>Consistent authenticity throughout session, as evidenced by focus/interest in participant, expression of caring and warmth, and present moment awareness                                          |    |
| <b>Non-verbal</b>             | Not observed; no nodding, blank or blunted facial expression; glancing off screen, looking at notes, fidgeting                                                                        |   | Rarely or occasionally employed non-verbal cues (e.g., occasional nods, shifts in facial expression), appeared blunted at times                                                        |   | Frequently demonstrated non-verbal cues through eye contact and other forms of body language (e.g., nodding, leaning into camera, smiling, etc.) to convey warmth and concern.<br><br>1-2 instances in which more nonverbal communication was indicated or nonverbal cues were incongruent with content shared by participant |   | Consistently employed non-verbal cues to genuinely convey empathy and concern, but most frequently engaged when speaking versus listening<br><br>Nonverbal cues were congruent with content shared by participant |   | Continuous and skillful use of non-verbal cues when speaking AND listening to convey genuine interest, care, and validation through natural shifts in body language/facial expressions, skillful variation in tone, and pacing of material               |    |
| <b>Open-Ended Questioning</b> | Did not ask any open-ended questions (only yes/no questions or no questions)                                                                                                          |   | Rarely or occasionally asked open-ended questions, but more frequently asked closed-ended or leading questions                                                                         |   | Frequently asked open-ended AND close-ended questions or asked closed ended questions but corrected themselves/ tried to reframe more open-endedly                                                                                                                                                                            |   | Consistently asked open-ended questions that conveyed curiosity about participant's experiences, thoughts, beliefs, etc.                                                                                          |   | Consistently and effectively used open-ended questions as a natural part of conversation. Flexibly responded to participant's statements with meaningful open-ended questions that conveyed concern and genuine curiosity about participant's experience |    |

## Process Skill & Module Integration Rating Anchors

| Categorical Ratings                          | Near Absence of Demonstrated Skills/ Needs Remediation                                                                         |   | Rarely and Inconsistently Demonstrated/ Beginner Level                                                                                                                                                                                                                             |   | Frequently Demonstrated with Occasional Lapses/ Intermediate Level                                                                                                                                                                                                             |   | Frequently and Consistently Demonstrated / Advanced Level                                                                                                                                                                                                                                                                             |   | Consistently and Skillfully Demonstrated / Exemplary Level                                                                                                                                                                                                              |    |
|----------------------------------------------|--------------------------------------------------------------------------------------------------------------------------------|---|------------------------------------------------------------------------------------------------------------------------------------------------------------------------------------------------------------------------------------------------------------------------------------|---|--------------------------------------------------------------------------------------------------------------------------------------------------------------------------------------------------------------------------------------------------------------------------------|---|---------------------------------------------------------------------------------------------------------------------------------------------------------------------------------------------------------------------------------------------------------------------------------------------------------------------------------------|---|-------------------------------------------------------------------------------------------------------------------------------------------------------------------------------------------------------------------------------------------------------------------------|----|
| Numerical Ratings                            | 1                                                                                                                              | 2 | 3                                                                                                                                                                                                                                                                                  | 4 | 5                                                                                                                                                                                                                                                                              | 6 | 7                                                                                                                                                                                                                                                                                                                                     | 8 | 9                                                                                                                                                                                                                                                                       | 10 |
| <b>Reflecting Emotions</b>                   | Did not use any reflections or used invalidating reflections (e.g., pt. endorses anxiety and coach says, "oh it's not so bad") |   | Occasional reflections or only used generic reflections (e.g., that sounds hard/stressful/difficult)<br><br>Delivery of validation was not paired with emotion congruent style and non-verbal cues (e.g., neutral tone when validating pain associated with loss of family member) |   | Accurately identified participant's emotions in some reflections, but frequently used generic reflections<br><br>Delivery of validation was sometimes paired with emotion congruent style and non-verbal cues (e.g., softening tone, pausing, furrowing brow to reflect grief) |   | Consistently identified participant's emotions and demonstrated empathy using some levels of validation<br><br>Delivery of validation was often paired with emotion congruent style and nonverbal cues (e.g., softening tone, pausing, furrowing brow to reflect grief)                                                               |   | Consistently and effectively reflected participant's emotions using all levels of validations and expanding on or adding insights to convey deeper understanding<br><br>Delivery of validation was always paired with emotion congruent style and nonverbal cues        |    |
| <b>Content Summaries</b>                     | Did not use content summaries                                                                                                  |   | Occasionally used content summaries or did not accurately summarize                                                                                                                                                                                                                |   | Usually accurately summarized content but could have been more clear, concise, or frequent                                                                                                                                                                                     |   | Consistently used accurate, clear, and concise content summaries                                                                                                                                                                                                                                                                      |   | Consistently and skillfully used clear, concise content summaries throughout to move the discussion forward and highlight key points                                                                                                                                    |    |
| <b>Collaborative Inquiry (Avoids Advice)</b> | Used direct advice and direct instructions (e.g., you should do XYZ)<br><br>Not collaborative                                  |   | Avoided direct advice; frequently used "quizzzy" questions (e.g., can you tell me what each letter of SMART stands for? Yes, S is for specific) and teachy style<br><br>Not collaborative                                                                                          |   | Avoided direct advice; inconsistent use of questions, summaries, and reflections that created opportunities for the participant to arrive at increased insight about a tool/module<br><br>Inconsistent evidence of collaboration                                               |   | Consistent use of questions, reflections, and summaries that created opportunities for the participant to arrive at increased insight about a tool/ module<br><br>Consistent evidence of collaboration (e.g., determined participant's preferences and needs in coaching session, elicited feedback and reactions throughout session) |   | Continuous use of questions, reflections, and summaries that created opportunities for the participant to arrive at increased insight about a tool/ module<br><br>Continuously strong collaboration that empowered the participant as an expert in their own experience |    |

## Process Skill & Module Integration Rating Anchors

| Categorical Ratings                           | Near Absence of Demonstrated Skills/ Needs Remediation                                                                         |   | Rarely and Inconsistently Demonstrated/ Beginner Level                                                                                                                                                                                                                                                      |   | Frequently Demonstrated with Occasional Lapses/ Intermediate Level                                                                                                                                                                                                                           |   | Frequently and Consistently Demonstrated / Advanced Level                                                                                                                                        |   | Consistently and Skillfully Demonstrated / Exemplary Level                                                                          |    |
|-----------------------------------------------|--------------------------------------------------------------------------------------------------------------------------------|---|-------------------------------------------------------------------------------------------------------------------------------------------------------------------------------------------------------------------------------------------------------------------------------------------------------------|---|----------------------------------------------------------------------------------------------------------------------------------------------------------------------------------------------------------------------------------------------------------------------------------------------|---|--------------------------------------------------------------------------------------------------------------------------------------------------------------------------------------------------|---|-------------------------------------------------------------------------------------------------------------------------------------|----|
| Numerical Ratings                             | 1                                                                                                                              | 2 | 3                                                                                                                                                                                                                                                                                                           | 4 | 5                                                                                                                                                                                                                                                                                            | 6 | 7                                                                                                                                                                                                | 8 | 9                                                                                                                                   | 10 |
| <b>Integration of Module Specific Content</b> | No discussion or complete misunderstanding of module; focused on process skills with limited acknowledgement of module content |   | Rarely discussed module target; and/or when discussed appeared to have poor understanding of how to apply module target to pt.'s concerns; may cover multiple module tools without applying to pt.'s concerns; limited integration of process skills with module target (e.g., focused on teaching content) |   | Typically, clear understanding and incorporation of module tools and targets throughout session; 1-2 instances in which it was unclear if trainer clearly understood or misapplies module content<br><br>Some integration of module tools and target with participant's experience and needs |   | Consistently clear understanding and incorporation of module tools and targets throughout session<br><br>Frequent integration of module tools and target with participant's experience and needs |   | Prioritizing participant's needs and experiences and accurately integrating module tools and targets to address participant's needs |    |
